# Supplementary material for: Maturation of adenovirus primes the protein nano-shell for successful endosomal escape
Source: Royal Society of Chemistry journal article supplement (doi:10.1039/c8nr10182e), 2019-01-01
Supplement: c8nr10182e3.pdf [file c8nr10182e3.pdf]

### **Supplementary Information**

#### Movies of capsid disassembly

The duration of each movie provided for WT-Fresh1 WT- Fresh2, EC-1, G33-1 is 160 minutes, 312 minutes, 96 minutes and 72 minutes, respectively.
